# Supplementary material for: Discovery and characterization of sgRNA-independent DNA cleavage from CRISPR/Cas9 in mouse embryos
Source: Research Square preprint supplement (doi:10.21203/rs.3.rs-1725345/v1), 2022-06-15
Supplement: Supplementary file 1 [file e472cb78fdb3a24f643de97b.pdf]

## **Title**

### **Discovery and characterization of sgRNA-independent DNA cleavage from CRISPR/Cas9 in mouse embryo**

Liyun Yang<sup>1#</sup>, Lijiao Chen<sup>1,2#</sup>, Yang Zheng<sup>1#</sup>, Li Deng<sup>1</sup>, Raoxian Bai<sup>1,2</sup>, Ting Zhang<sup>1,2</sup>, Zhengbo Wang<sup>1,2</sup>, Shangang Li<sup>1,2</sup>

1. State Key Laboratory of Primate Biomedical Research; Institute of Primate Translational Medicine, Kunming University of Science and Technology, Kunming, Yunnan, 650500, China
2. Yunnan Key Laboratory of Primate Biomedical Research, Kunming, Yunnan, 650500, China

## **Supplementary-information**

Supplementary Table S1

Supplementary Table S2

Supplementary Table S3

Supplementary Table S4

Supplementary Table S5

Supplementary Table S6

Supplementary Table S7

Supplementary Table S8

Supplementary Table S9

Supplementary Figure S1

Supplementary Figure S2

Supplementary Figure S3

Supplementary Figure S4

Supplementary Figure S5

Supplementary Figure S6

Supplementary Figure S7

Supplementary Figure S8

Supplementary Figure S9

Full -length gel of different figures in the article

**Supplementary TableS1 PCR primers**

| Name       | Sequence(5' -3' )                                           |
|------------|-------------------------------------------------------------|
| Tyr-JDF    | AGACTGTTCTTGCTATTATGGGA                                     |
| Tyr-JDR    | ATTGGCCGATCCCTGACTT                                         |
| TYR-lowsg  | TTAATACGACTCACTATAGGACCACTATTACGTAATCCGTTTTAGAGCTAGAAATAGC  |
| TYR-highsg | TTAATACGACTCACTATATTATGCGATGGAAACACCTGAGTTTTAGAGCTAGAAATAGC |
| Scaffold-F | GTTTTAGAGCTAGAAATAGC                                        |
| T7-R1      | AAAAGCACCGACTCGGTGCCA                                       |

**Supplementary TableS2 The cutting efficiency of sgRNAs was verified in Tyr-low group and Tyr-high group**

| Group    | Embryo with pronuclear | Number of blastocysts | Mutation mice number |
|----------|------------------------|-----------------------|----------------------|
| Tyr-low  | 15                     | 5                     | 5                    |
| Tyr-high | 20                     | 7                     | 6                    |

**Supplementary TableS3 In vitro development of early mouse embryos in three groups**

| Group    | Embryo with pronuclear | 2-cell(%)                     | Blastocysts(%)                |
|----------|------------------------|-------------------------------|-------------------------------|
| Control  | 85                     | 72(84.70,72/85) <sup>a</sup>  | 43(50.58,43/85) <sup>a</sup>  |
| Tyr-low  | 111                    | 97(87.39,97/111) <sup>a</sup> | 50(45.05,50/111) <sup>a</sup> |
| Tyr-high | 111                    | 85(76.57,85/111) <sup>a</sup> | 39(35.14,39/111) <sup>b</sup> |

**Supplementary TableS4 Pregnancy of full-term mice in the two groups**

| Group    | 2-cell embryo | Receptor number | New born mice(%)              | Mutation mice number(%)       |
|----------|---------------|-----------------|-------------------------------|-------------------------------|
| Tyr-low  | 250           | 5               | 17(6.80, 17/250) <sup>a</sup> | 16(94.12, 16/17) <sup>a</sup> |
| Tyr-high | 176           | 4               | 0(0, 0/176) <sup>b</sup>      | 0(0, 0/0)                     |

**Supplementary Table S5 Genotype statistics of full-term mice in Tyr low group and 13.5d mouse embryos in Tyr high group**

| Tyr-low 组类型 | Tyr-low 组突变类型      | 小鼠只数 |
|-------------|--------------------|------|
| Type1       | -54bp/-1bp,+1bp    | 1    |
| Type2       | -162bp/-1bp        | 1    |
| Type3       | +1bp/+1bp          | 3    |
| Type4       | -8bp/+1bp          | 1    |
| Type5       | -7bp/-116bp,+116bp | 1    |
| Type6       | -58bp/-58bp        | 1    |

| Type7        | -162bp/+1bp                      | 1    |
|--------------|----------------------------------|------|
| Type8        | -87bp/-170bp                     | 1    |
| Type9        | -7bp/-7bp                        | 1    |
| Type10       | -34bp/-1bp                       | 1    |
| Tyr-high 组类型 | Tyr-high 组突变类型                   | 小鼠只数 |
| Type1        | -12bp/-40bp                      | 2    |
| Type2        | -11bp/-2bp,+8bp                  | 1    |
| Type3        | -12bp/-15bp                      | 1    |
| Type4        | +1bp/-168bp                      | 1    |
| Type5        | +1bp/-117bp                      | 1    |
| Type6        | -12bp/-12bp                      | 8    |
| Type7        | -12bp/-65bp                      | 1    |
| Type8        | -16bp/+1bp                       | 1    |
| Type9        | -8bp/-8bp                        | 1    |
| Type10       | +1bp/+1bp                        | 1    |
| Type11       | +1bp/+2bp                        | 1    |
| Type12       | -12bp/+2bp                       | 1    |
| Type13       | -11bp/+1bp                       | 1    |
| Type14       | -12bp/ <u>-8bp</u> , <u>+8bp</u> | 1    |

**Supplementary Table S6 Potential off target sequences (POTS) for Tyr-low sgRNA and Tyr-high sgRNA.**

The potential off-target sites of the two sgRNAs were predicted using the online-based tool (<http://crispor.tefor.net/>). The top three POTS were selected for each sgRNA according to the ranking scores. The blue colored nts are the sgRNA sequences, the red nts are the PAMs, and the red nts with underline is the primers used for PCR and sequence analysis.

|                                       |                                                                                                                                                                                                                                                                                                                                                                                                                                                                                                                                                                            |
|---------------------------------------|----------------------------------------------------------------------------------------------------------------------------------------------------------------------------------------------------------------------------------------------------------------------------------------------------------------------------------------------------------------------------------------------------------------------------------------------------------------------------------------------------------------------------------------------------------------------------|
| TYR-low sgRNA potential off target #1 | <p>mm4_intron_Ppp2ca_chr11_51994338</p> <p>aaaataaatcttaaaaaaaaaaagaatgtcatcttgatcaaaaagtttagcttaacaacg<u>cggt</u><br/> <u>ggtgatgacatatg</u>tcttaatcccagcacttgaaaaatctcttgagttgagccagcctggtctac<br/> agactgagttctagaacagccagggctacacagagaaaccttgctcaagaaaacaaaataca<br/> aacaaaaaatcagcttatcaaatcaataacaagcagtttcttttccattctcaagtaacaaatgt<br/> ttaagctaaatgacatcataatgtctctatttattgacattataatgtctgtattagatagagacag<br/> <u>acctctctaatgtaatc</u>tggtgtcctcaaactcaaggatctgcctaactcttccaagtctggc<br/> tgaccagagctcactatagattagactgtcacagaagccatgatgcctttgactcttgccatcc</p> |
|---------------------------------------|----------------------------------------------------------------------------------------------------------------------------------------------------------------------------------------------------------------------------------------------------------------------------------------------------------------------------------------------------------------------------------------------------------------------------------------------------------------------------------------------------------------------------------------------------------------------------|

|                                          |                                                                                                                                                                                                                                                                                                                                                                                                                                                                                                                                                                                                                                                                                                                      |
|------------------------------------------|----------------------------------------------------------------------------------------------------------------------------------------------------------------------------------------------------------------------------------------------------------------------------------------------------------------------------------------------------------------------------------------------------------------------------------------------------------------------------------------------------------------------------------------------------------------------------------------------------------------------------------------------------------------------------------------------------------------------|
|                                          | tcctgcatgagcttcagagtgtgctgattataagcattataaccacactcaccaagttgatagtat<br>ttaccttttccatc <u>tgaggatggaactgtgccta</u> agatggaactgcatgtctcacccaaA                                                                                                                                                                                                                                                                                                                                                                                                                                                                                                                                                                          |
| TYR-low sgRNA potential<br>off target #2 | mm4_exon_Slc7a7_chr14_54646155<br>Cgccatggtcaacagca <u>ccaagtatgaagtggctgctc</u> agcacgaggccgacgatggctctgctc<br>tcgggatggggccagcccagtgccggagcaggtcaaactgaagaaggagatctccctgcttaat<br>ggcgtgtgtctcatagtgggaacatgatcggctccggcatctttgtctcccctaagggtgtgctcat<br>gtacagtgcctctttggcctctcactggtcatctgggctgtcggggcattttctccgtctttggggc<br>cctttgtacgtgaactgg <u>gtaccaccattaagaaatccggg</u> gccagctatgcttatatcctggag<br>gccttcgggggattccttgcgttcatccgctctggacttctctgctcatcattgaaccacagcca<br>ggcgtcattgccatcacctttgcaactacatggtgcagcccctctccgagctgtggcgtccct<br>atgccgccggccgctgctggcgtgctgcatctgtaagtagagatggggcaggattg <u>gtgtgtg</u><br><u>ggaggactgggta</u> gaagtgggggtgtgtgagtcacccaaggaggaggagctgggaaatgattg<br>cctaca |
| TYR-low sgRNA potential<br>off target #3 | mm4_intergenic_Snd1 Lrrc4_chr6_28799427<br>Cta <u>gcatgcacattttggtcagc</u> ctggaagagatgttgagtgtctggaattccttgagtaaaggt<br>aagaatttaaatccccaaaaggctctggctgccctgagcttcaggtcagagaatcaggtataa<br>cctggtatttgacttctagctcttctgccttagggctggcaatgcctctgcatgccagaccactgc<br>ccaggaccaggattactaaatccaggagaagcaagccaaaagggatcaggtttaaagggaac<br>accaggtagcagacaagaaaaagaagtgggtgatgaaaggccaagagaccacttaggaaa<br>atgggactgaacggtggctgcaaatgcagtagttccgtgatacatatggcagctgatatgtaca<br>ggcaagcgtgggaacctgtcccataatgggaggccatctgaaatgtagagaagcctcacctg<br>ccccgtgcaggcctgccttacgtagcaatgggatggaaaggcaagcagttttctactactcaa <u>a</u><br><u>gcagaggagagacaggta</u> ttggtgcctgcttatcceaagccaggaaaaataagtagtagttct<br>agtgtctgcatc        |

|                                           |                                                                                                                                                                                                                                                                                                                                                                                                                                                                                                                                                                                                                                                                                                                                           |
|-------------------------------------------|-------------------------------------------------------------------------------------------------------------------------------------------------------------------------------------------------------------------------------------------------------------------------------------------------------------------------------------------------------------------------------------------------------------------------------------------------------------------------------------------------------------------------------------------------------------------------------------------------------------------------------------------------------------------------------------------------------------------------------------------|
| TYR-high sgRNA potential<br>off target #1 | mm4_intergenic_Gm6594 Pkdcc_chr17_82876378<br>Aattagactagcagtgccagccacaataataataaatgcctagcatggtaggttaagttcactt <u>tc</u><br><u>atctaactgccagaagct</u> gaatgatactgatgtgcaattcaacatctttctgtctcagaagtaa<br>ctcattaacataaattgttttccagatcattgtagcagatcagaagagtataatagccatcaggt<br><u>ttatgcatggaacactgagg</u> accactattacgtaatcctggaaacatgacaaagccaaaac<br>ccccaggctccatctcagcagatgtggaattttgctgagttgaccagatgaatctggatcaat<br>ggatagaactccaattcagctttagaaacacactggaagtaataatcctgtgttcattaattttga<br>tttttttaattataattctttcagaaattctgggctcagagatgtttataatttaaaattttgtgagtt<br>ttgaaatgttatgcttcaattatacccatggtgatagtaaacttagctagcatagatattctactata<br>ctccagaaatttagtatataaaagggaaag <u>ggaagcgaaggaaaggaaaga</u> aaaggaaaggg<br>aagggaaggaaggg |
| TYR-high sgRNA potential<br>off target #2 | mm4_intron_Spats2_chr15_99193920<br>Ttgattttcaagacaggatttcttgtgtagc <u>ctggctgcccttagacc</u> acgctggtctcagactca<br>cagagatctactgctctgctctgagtgctggcatgagccactgctgctggtgttttaagtttg<br>agaaaataaaatcaagtaaaatattacctgggaatattactgcatggttagagtattctggta<br>tgtaattggtttgagatccacacagttgtatgtaaaatactgttttctaatgcatgaaacataaca                                                                                                                                                                                                                                                                                                                                                                                                               |

|                                        |                                                                                                                                                                                                                                                                                                                                                                                                                                                                                                                                                                                                                                                                            |
|----------------------------------------|----------------------------------------------------------------------------------------------------------------------------------------------------------------------------------------------------------------------------------------------------------------------------------------------------------------------------------------------------------------------------------------------------------------------------------------------------------------------------------------------------------------------------------------------------------------------------------------------------------------------------------------------------------------------------|
|                                        | <p>agtaataattatTTTTGATACCAAGGAACACCTGAAGGCGAGGCTAGAATCAAATGACTAGTAAC<br/> gtgttaggtacttcagTCAAGGCTGTGTGAAGTCACAGGCACAGAATGTATCTCAGAGACGCTA<br/> gtggtgatgctgcagtaacagctgctctgaccaataaattgcacaaaagctttaaaataagttcagc<br/> aatcacagtcttagataagaaggcctggctggagggggggggtgagatagagaccagtcagcta<br/> tcagtgTTTTCCCTAATGATAGTGGCCAGGTAAGCAAAGCATATTACTTGATTAAGAAAAGAT</p>                                                                                                                                                                                                                                                                                                         |
| TYR-high sgRNA potential off target #3 | <p>mm4_intergenic_Gm13198 Ccdc3/Gm26776_chr2_5215861<br/> AattctcaagataaacagctcttGTTGTGCTGGCTGGATatggccacgtggacaaagtcaactat<br/> tctgtacgaagcaatacaagcaggccctcagctgctaagttcccattgattcccagcagggtgg<br/> gCGGAAGGAGCTCTGGAGTTCCAGCCAGCCATGGGATGCCAGGCAATGCAGGAGTCACAAGG<br/> AAAAAATCAGACTCGACTGCCTCTGAAGTGAAGAGCTAGAGACTGAATGCTAATCATCAGTGT<br/> CAGGTCAAAGGTGCGTCAGATCATTGCACCATGTGATGGAACACCTGTGGGATGGAGCACCAGT<br/> GAGAGGGGAGCATCGGTAAGAGGGAGCACCCATGGGATGGAGCCCCATGAGAGGGAGTACCAGT<br/> GGAATGGAGCACTGTGGAATCGAGCACCAGTGAAGTGGAGCAGGAACAGAGAGGTTCTGCTCTA<br/> GGATTCCTCTCTCAGTGGAGCTGGTCCACAGACACTGGTCTTCAGTCAGCCTGACCTCCATATC<br/> CTGTGAGATGGATGTTATAGATGTTCTCTA</p> |

Supplementary Table S7 preliminary comparison of Cut&Tag sequencing data

|                | Control    | Edit       |
|----------------|------------|------------|
| Reads Counts   | 12,883,306 | 36,660,240 |
| Alignment rate | 86.32%     | 80.51%     |

Supplementary Table S8 On target and off targets information of Tyr-low sgRNA

| MARK | guideSeq                   | oftargetSeq                 | mismatchPos | mismatchCount | mitOfftargetScore | ofdOfftargetScore | chrom | start     | end       | strand | locusDc                           |
|------|----------------------------|-----------------------------|-------------|---------------|-------------------|-------------------|-------|-----------|-----------|--------|-----------------------------------|
| A    | GGACCACTATTACGT<br>AATCTGG | TGACCACTAATAAGTCATC<br>CAGG | * * * * *   | 4             | 0.097067          | 0                 | chr1  | 40737262  | 40737284  | +      | intron:Slc9                       |
| B    | GGACCACTATTACGT<br>AATCTGG | AGACCAAACTACTTAATC<br>CAGG  | * ** * *    | 4             | 0.152973          | 0.144             | chr4  | 78431802  | 78431824  | -      | intergenicI<br>260-Gm11;          |
| C    | GGACCACTATTACGT<br>AATCTGG | GGCCCACTCTTACGACT<br>CAGGG  | * * * * *   | 4             | 0.15314           | 0.021609          | chr5  | 71104752  | 71104774  | -      | intergenicI<br>2-Cox7b2;          |
| D    | GGACCACTATTACGT<br>AATCTGG | GGACCACTCTCAGGTAAC<br>CCGG  | * * * * *   | 4             | 0.036801          | 0.022263          | chr5  | 149329336 | 149329358 | -      | intergenicJ<br>p-BC02841          |
| E    | GGACCACTATTACGT<br>AATCTGG | GGAACTACTTAAGTATC<br>CTGG   | ** * * *    | 4             | 0.100057          | 0                 | chr6  | 106175424 | 106175446 | -      | intron:Crtn                       |
| F    | GGACCACTATTACGT<br>AATCTGG | GGACCAAGTAACTAAAT<br>CCAGG  | ** ** *     | 4             | 0.037227          | 0.053278          | chr6  | 28799429  | 28799451  | -      | intergenicI<br>Lrrc4              |
| G    | GGACCACTATTACGT<br>AATCTGG | GGACCACTATTAGTAAT<br>CTGG   | -----       |               |                   |                   | chr7  | 87483642  | 87484272  | →      | Ontari                            |
| H    | GGACCACTATTACGT<br>AATCTGG | GGACCACTATTCTGTAAAC<br>CAGG | * * * * *   | 4             | 0.036468          | 0.064145          | chr9  | 20961883  | 20961905  | -      | intergenicI<br>-S1pr2             |
| I    | GGACCACTATTACGT<br>AATCTGG | GGACCACTACTAGGGCT<br>CCAGG  | * * * * *   | 4             | 0.02231           | 0.004936          | chr9  | 105387117 | 105387139 | +      | intergenicI<br>619/Nek11<br>Nek11 |
| J    | GGACCACTATTACGT<br>AATCTGG | GGCCCAATGACATAAT<br>CCAGG   | * * * * *   | 4             | 0.116657          | 0.146667          | chr10 | 44363996  | 44364018  | -      | exon:Atg5                         |
| K    | GGACCACTATTACGT<br>AATCTGG | AGACCACTTTACCTAAGC<br>CTGG  | * * * * *   | 4             | 0.028252          | 0.077143          | chr10 | 48517224  | 48517246  | +      | intergenicI<br>584-Gm24;          |
| L    | GGACCACTATTACGT<br>AATCTGG | GGACCACTAAGAGTAT<br>ACTGG   | * * * * *   | 4             | 0.015884          | 0                 | chr10 | 110284174 | 110284196 | -      | intergenicI<br>E27                |
| M    | GGACCACTATTACGT<br>AATCTGG | GGACCTCTTAAGTATC<br>CTGG    | * * * * *   | 4             | 0.108371          | 0.214286          | chr11 | 52103512  | 52103534  | -      | intergenicI<br>a/Gm2415;<br>ca    |
| N    | GGACCACTATTACGT<br>AATCTGG | GGACCAAACTCCATAAT<br>CTGG   | * * * * *   | 4             | 0.092156          | 0.077336          | chr11 | 67423855  | 67423877  | -      | intergenicI<br>-Gas7              |
| O    | GGACCACTATTACGT<br>AATCTGG | GTACCACTTAAGAATC<br>CGGG    | * * * * *   | 4             | 0.155902          | 0.1417            | chr14 | 54408699  | 54408721  | -      | exon:Slc7a                        |
| P    | GGACCACTATTACGT<br>AATCTGG | GGCCCGAATTAAGTAAT<br>CCGGA  | * * * * *   | 3             | 0.289504          | 0.017007          | chr15 | 76307382  | 76307404  | -      | exon:Oplat                        |
| Q    | GGACCACTATTACGT<br>AATCTGG | GGCCCACTAATCTGAT<br>CCAGG   | * * * * *   | 4             | 0.034983          | 0.026862          | chr16 | 44530212  | 44530234  | -      | intergenicI<br>Mir3081            |
| R    | GGACCACTATTACGT<br>AATCTGG | GGACCACTATTAGAATC<br>CAGGG  | * * * * *   | 4             | 0.022728          | 0.035759          | chrX  | 40328836  | 40328858  | +      | intergenicI<br>86-Gm146;          |
| S    | GGACCACTATTACGT<br>AATCTGG | GGACCACTATTGGGAAT<br>CCAGG  | * * * * *   | 4             | 0.073007          | 0.001299          | chrX  | 168802166 | 168802188 | +      | intron:Arhg                       |

Supplementary Table S9 Analysis of on target and off targets site reads

| Chr  | Star      | End       | Reads | Sign |
|------|-----------|-----------|-------|------|
| chr1 | 40730000  | 40740000  | 296   | A    |
| chr5 | 149322206 | 149339358 | 319   | D    |

|       |           |           |      |   |
|-------|-----------|-----------|------|---|
| chr7  | 87475000  | 87480000  | 2    | G |
| chr9  | 20951883  | 20960000  | 783  | H |
| chr9  | 105382206 | 105387206 | 1    | I |
| chr10 | 48520000  | 48525000  | 3    | K |
| chr10 | 110274174 | 110282206 | 18   | L |
| chr10 | 110282206 | 110294196 | 810  | L |
| chr11 | 52093512  | 52095000  | 557  | M |
| chr11 | 52095000  | 52110000  | 702  | M |
| chr11 | 67413855  | 67415000  | 364  | N |
| chr14 | 54398699  | 54415000  | 409  | O |
| chr15 | 76297382  | 76300000  | 2548 | P |
| chr15 | 76300000  | 76315000  | 336  | P |
| chrX  | 40318836  | 40330000  | 875  | R |

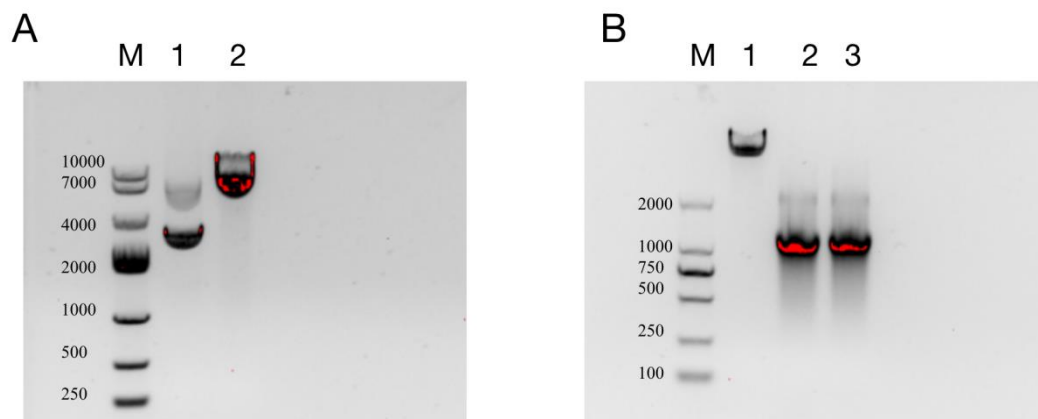

**Supplementary Figure S1. Synthesis of spCas9 mRNA.**

(A) Agarose gel for the linear pT7-Cas9 vector after enzyme digestion. M, DL10000 DNA marker. 1, pT7-Cas9 vector. 2, linear pT7-Cas9 vector after enzyme digestion. (B) Agarose gel map of spCas9 mRNA (2&3). M, DL 2000 DNA marker. 1, linear pT7-Cas9 vector. 2&3, spCas9 mRNA

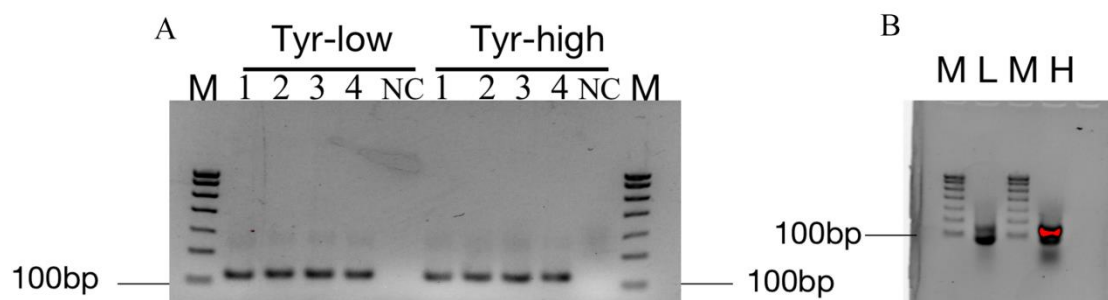

**Supplementary Figure S2. Design and synthesis of sgRNA.**

(A) sgRNA in vitro transcription template agarose gel map for Tyr-low group and Tyr-high group. M, 250 bp DNA Ladder. NC, Negative Control. (B) Synthesis of Tyr-low sgRNA(L) and Tyr-high sgRNA(H) agarose gel map. M, 250 bp DNA Ladder.

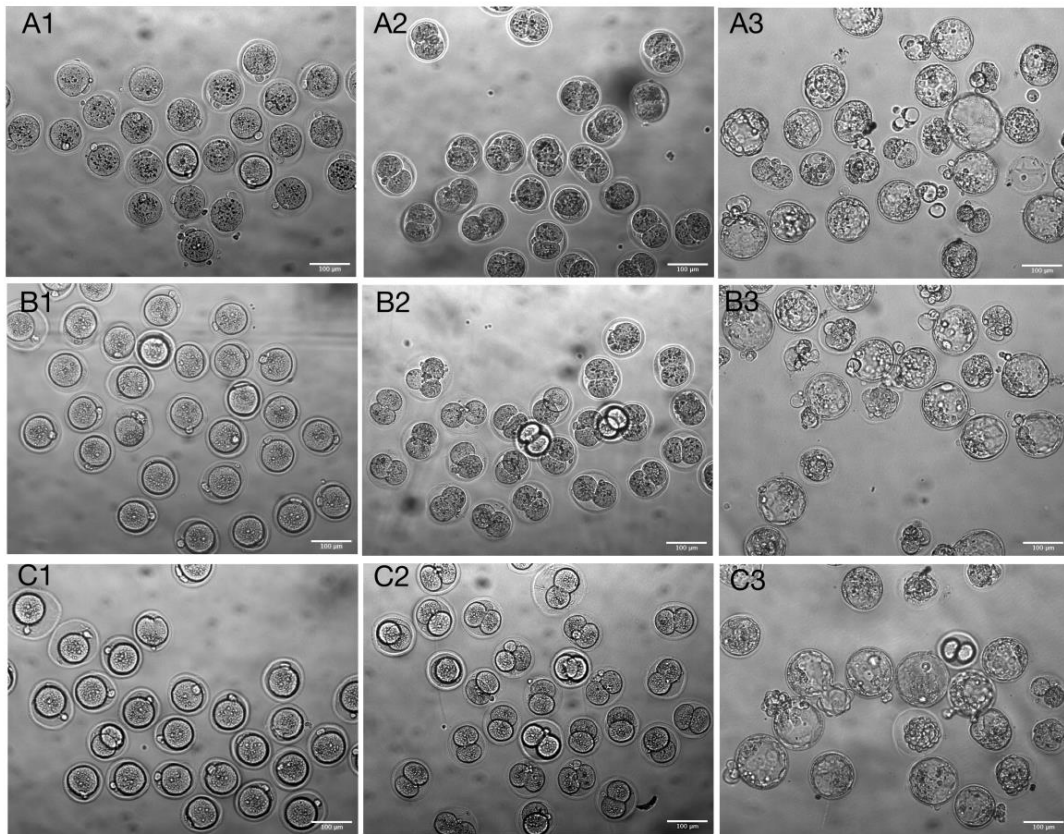

**Supplementary Figure S3. Example of embryo in vitro development of control, Tyr-low sgRNA injected group and Tyr-high sgRNA injected group.**

(A1~A3), In vitro development of uninjected embryos. A1, pronuclear stage. A2, 2-cell. A3, blastocyst. (B1~B3), In vitro development of embryos injected with Tyr low sgRNA. B1, prokaryotic period. B2, 2-cell. B3, blastocyst. (C1~C3), In vitro development of embryos injected with Tyr high sgRNA . C1, pronuclear stage. C2, 2-cell; C3, blastocyst

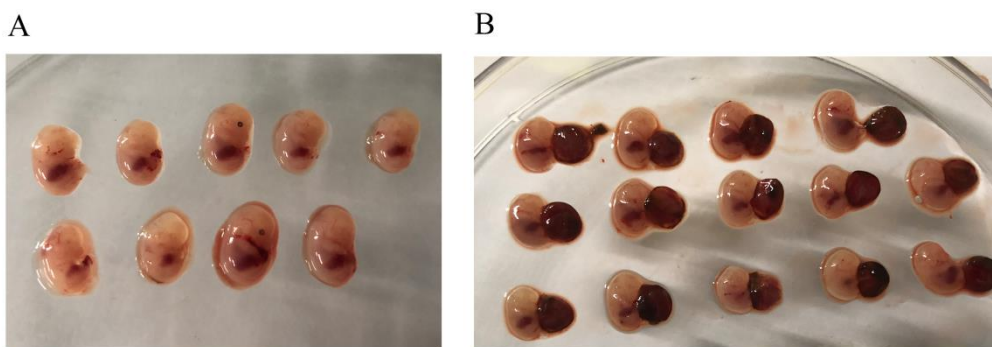

**Supplementary Figure S4.. Embryo in vitro development of three groups and the full term development of the transplanted embryos**

(A&B)13.5d fetus from embryos co-injected Spcas9 mRNA and *Tyr*-high sgRNA.

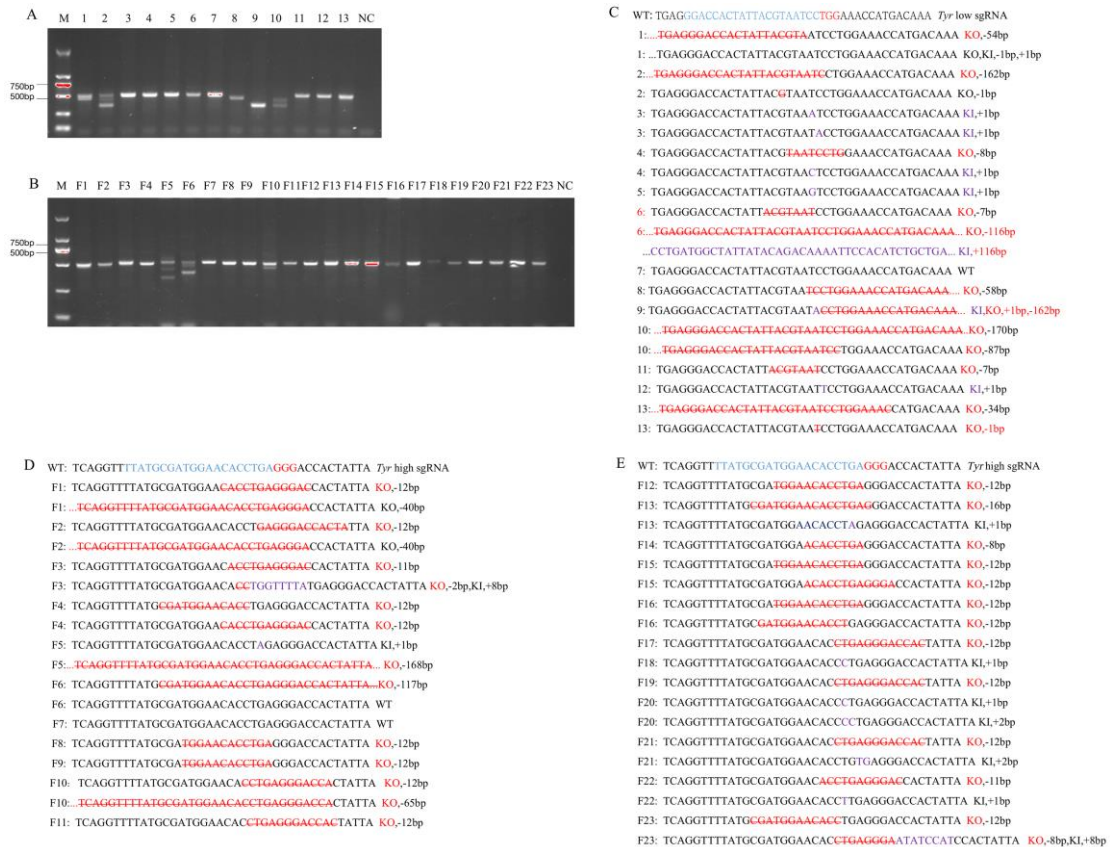

**Supplementary Figure S5 Agarose gel map and genotype of Tyr-low1-13# and Tyr-high1-23#**  
 (A) Agarose gel map of full-term birth knockout mice in Tyr-low group. (B) Agarose gel map of 13.5d anatomical knockout mice in Tyr-high group. (C) Genotype analysis of 13 birth mice in Tyr low group. (D&E) Genotype analysis of 13.5d anatomical knockout fetus in Tyr high group.

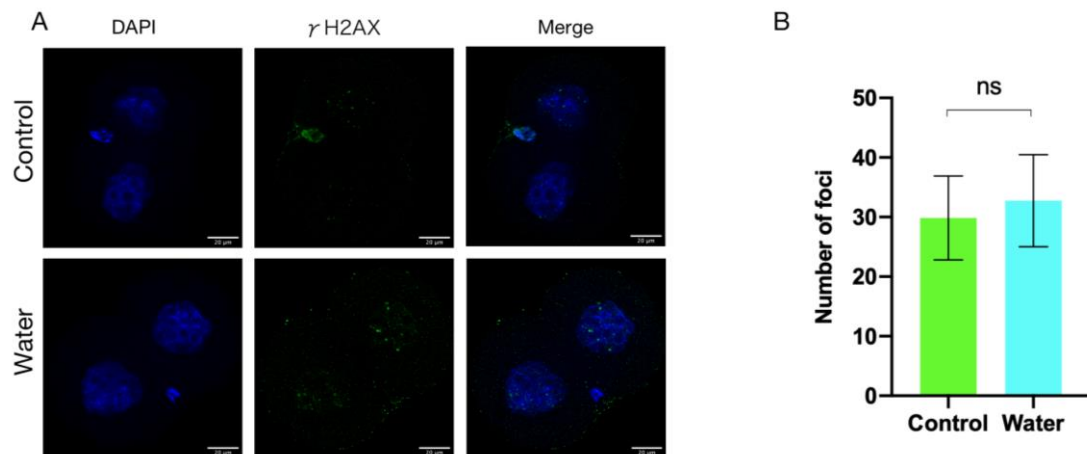

**Supplementary Figure S6 Comparison of the number of foci of cytoplasmic injected water and unmanipulated mouse embryos at 18 h**

(A)  $\gamma$ H2AX immunofluorescence staining of cytoplasmic injected water and unmanipulated (Control) mouse embryos cultured for 18 hours (bar=20 $\mu$ m, means  $\pm$  sem). (B)  $\gamma$ H2AX focus statistical histogram of cytoplasmic injected water and unmanipulated mouse embryos cultured for 18 hours.

(B)

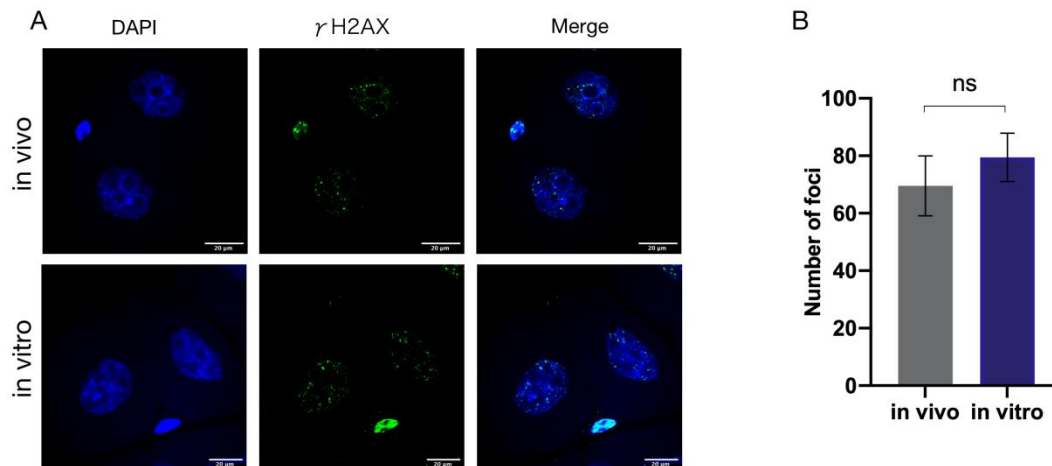

**Supplementary Figure S7 Comparison of the number of foci of embryos in vivo and in vitro at 15 h**

(A)  $\gamma$ H2AX immunofluorescence staining of mouse early embryos cultured in vivo and in vitro for 15 hours (bar=20 $\mu$ m, means  $\pm$  sem). (B)  $\gamma$ H2AX focus statistical histogram of mouse early embryos cultured in vivo and in vitro for 15 hours.

| Edit:                                                                                                                                                                                                                                                                                                                                                                                                                                                                                                                                                                                                                                                     | Control:                                                                                                                                                                                                                                                                                                                                                                                                                                                                                                                                                                                                                                             |
|-----------------------------------------------------------------------------------------------------------------------------------------------------------------------------------------------------------------------------------------------------------------------------------------------------------------------------------------------------------------------------------------------------------------------------------------------------------------------------------------------------------------------------------------------------------------------------------------------------------------------------------------------------------|------------------------------------------------------------------------------------------------------------------------------------------------------------------------------------------------------------------------------------------------------------------------------------------------------------------------------------------------------------------------------------------------------------------------------------------------------------------------------------------------------------------------------------------------------------------------------------------------------------------------------------------------------|
| <b>36660240 reads</b> ; of these:<br>36660240 (100.00%) were paired; of these:<br>8669516 (23.65%) aligned concordantly 0 times<br>24070402 (65.66%) aligned concordantly exactly 1 time<br>3920322 (10.69%) aligned concordantly >1 times<br>-----<br>8669516 pairs aligned concordantly 0 times; of these:<br>145369 (1.68%) aligned discordantly 1 time<br>-----<br>8524147 pairs aligned 0 times concordantly or discordantly;<br>of these:<br>17048294 mates make up the pairs; of these:<br>14290370 (83.82%) aligned 0 times<br>2382010 (13.97%) aligned exactly 1 time<br>375914 (2.20%) aligned >1 times<br><b>80.51% overall alignment rate</b> | <b>12883306 reads</b> ; of these:<br>12883306 (100.00%) were paired; of these:<br>2267614 (17.60%) aligned concordantly 0 times<br>8738255 (67.83%) aligned concordantly exactly 1 time<br>1877437 (14.57%) aligned concordantly >1 times<br>-----<br>2267614 pairs aligned concordantly 0 times; of these:<br>75309 (3.32%) aligned discordantly 1 time<br>-----<br>2192305 pairs aligned 0 times concordantly or discordantly;<br>of these:<br>4384610 mates make up the pairs; of these:<br>3524661 (80.39%) aligned 0 times<br>718799 (16.39%) aligned exactly 1 time<br>141150 (3.22%) aligned >1 times<br><b>86.32% overall alignment rate</b> |

|          |               |      |           |           |   |   |                  |     |               |      |
|----------|---------------|------|-----------|-----------|---|---|------------------|-----|---------------|------|
| intronic | Adgrb3        | chr1 | 25470000  | 25480000  | 0 | 0 | comments:Control | 0.0 | comments:Edit | 12.0 |
| intronic | Prim2         | chr1 | 33570000  | 33580000  | 0 | 0 | comments:Control | 0.0 | comments:Edit | 21.0 |
| exonic   | D630023F18Rik | chr1 | 65110000  | 65120000  | 0 | 0 | comments:Control | 0.0 | comments:Edit | 30.0 |
| exonic   | Mreg          | chr1 | 72160000  | 72170000  | 0 | 0 | comments:Control | 0.0 | comments:Edit | 44.0 |
| exonic   | Tns1          | chr1 | 73990000  | 74000000  | 0 | 0 | comments:Control | 0.0 | comments:Edit | 13.0 |
| exonic   | Iqca          | chr1 | 90100000  | 90110000  | 0 | 0 | comments:Control | 0.0 | comments:Edit | 22.0 |
| exonic   | Gal3st2b      | chr1 | 93940000  | 93950000  | 0 | 0 | comments:Control | 0.0 | comments:Edit | 33.0 |
| exonic   | Gli2          | chr1 | 118850000 | 118860000 | 0 | 0 | comments:Control | 0.0 | comments:Edit | 13.0 |
| intronic | Tmem163       | chr1 | 127520000 | 127530000 | 0 | 0 | comments:Control | 0.0 | comments:Edit | 20.0 |
| exonic   | Dars          | chr1 | 128360000 | 128370000 | 0 | 0 | comments:Control | 0.0 | comments:Edit | 16.0 |
| exonic   | Fcmr          | chr1 | 130870000 | 130880000 | 0 | 0 | comments:Control | 0.0 | comments:Edit | 18.0 |
| exonic   | Rab7b         | chr1 | 131700000 | 131710000 | 0 | 0 | comments:Control | 0.0 | comments:Edit | 21.0 |
| exonic   | Edem3         | chr1 | 151800000 | 151810000 | 0 | 0 | comments:Control | 0.0 | comments:Edit | 16.0 |
| exonic   | Colgalt2      | chr1 | 152500000 | 152510000 | 0 | 0 | comments:Control | 0.0 | comments:Edit | 12.0 |
| exonic   | Qsox1         | chr1 | 155800000 | 155810000 | 0 | 0 | comments:Control | 0.0 | comments:Edit | 12.0 |
| exonic   | Kifap3        | chr1 | 163910000 | 163920000 | 0 | 0 | comments:Control | 0.0 | comments:Edit | 16.0 |

**Supplementary Figure S8 Annotation of sgRNA independent Random off target sites(Exon, Intro, UTR, Control=0, Edit>10)**

A M 1 2 3 4 5 6 7 8 NC M

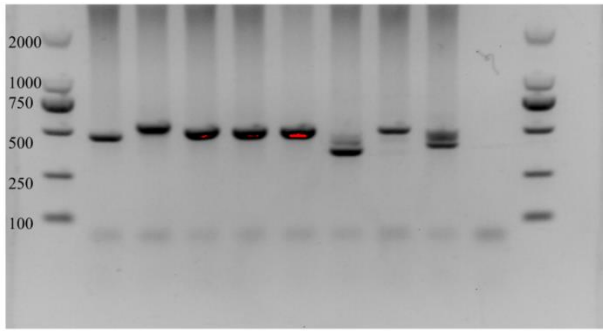

B

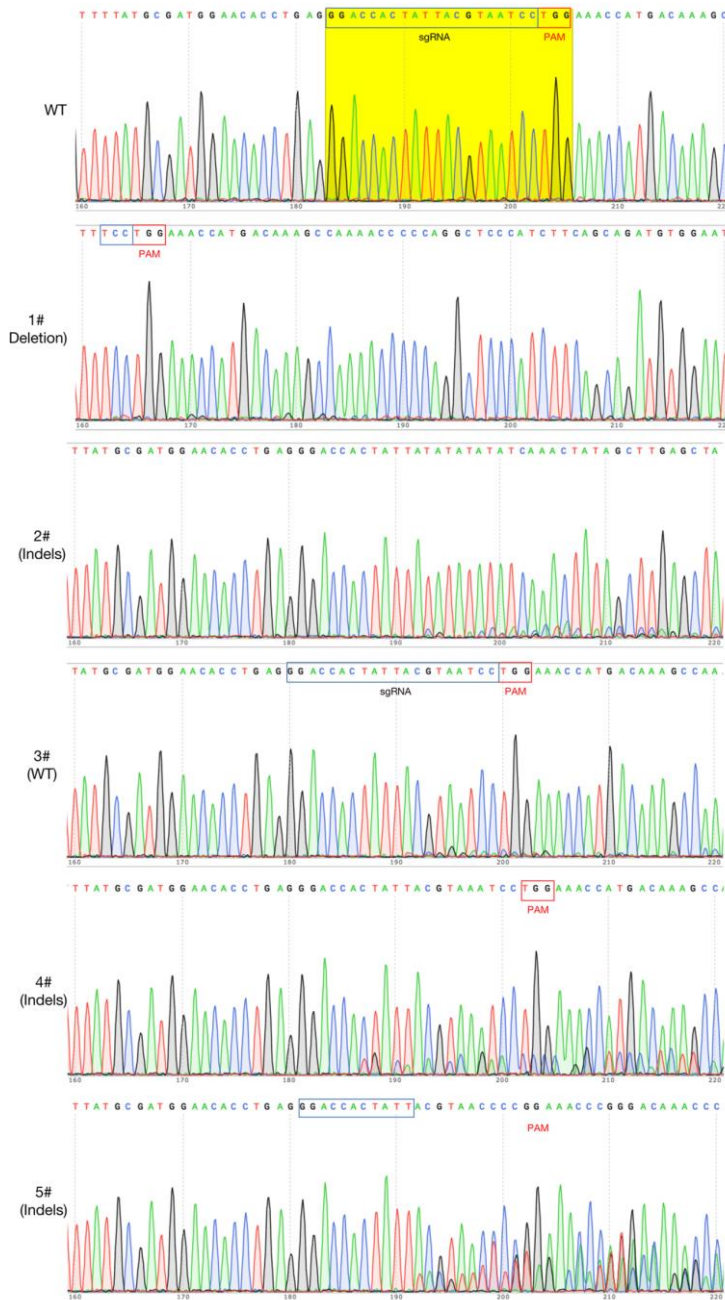

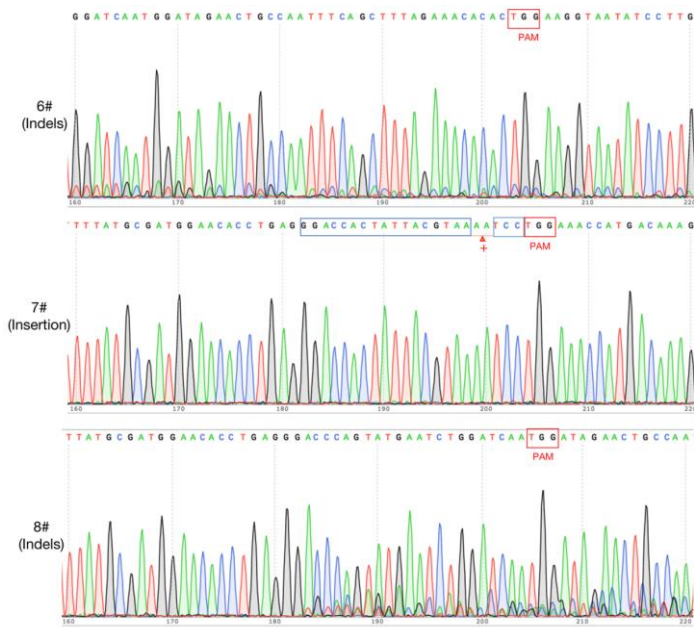

**Supplementary Figure S9 Agarose gel map and the DNA sequence of fragments of *Tyr-low* group in 15h after injection**

(A) Agarose gel map of *Tyr-low* group at 15h after CPI. M, DL2000 DNA Marker. NC, Negative Control. 1-8#, *Tyr-low* group 2-cell embryo in 15h after injection. (B) Chromatograms of *Tyr-low* group at 15h after CPI. WT, Wild Type. 1-8#, *Tyr-low* group 2-cell embryo in 15h after injection. The PAM was boxed in red, the sgRNA sequence was boxed in blue,

**Full-length gel in the article**

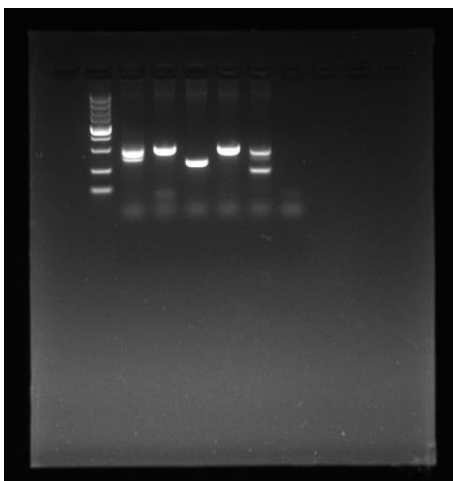

Full-length gel of Figure 1A up

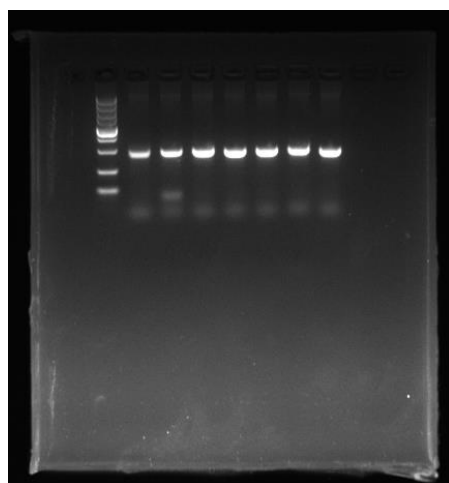

Full-length gel of Figure 1A down

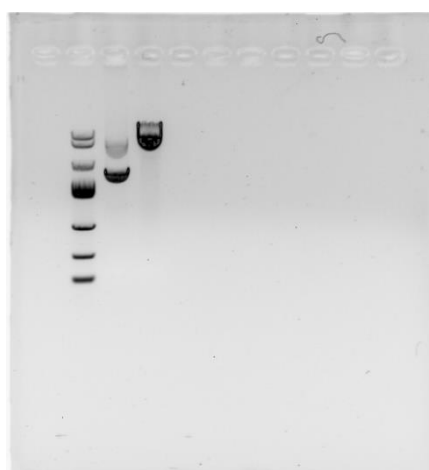

Full-length gel of Figure S1A

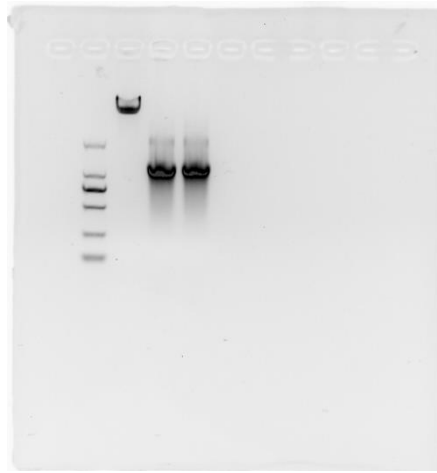

Full-length gel of Figure S1B

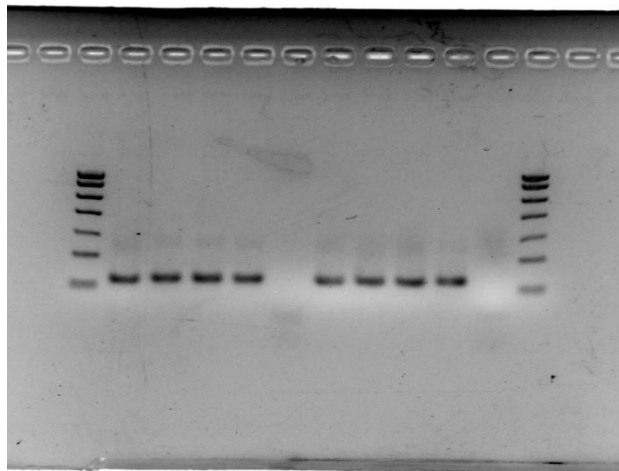

Full-length gel of Figure S2B

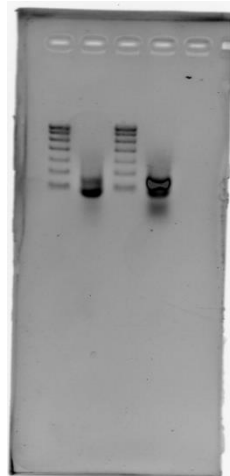

Full-length gel of Figure S2C

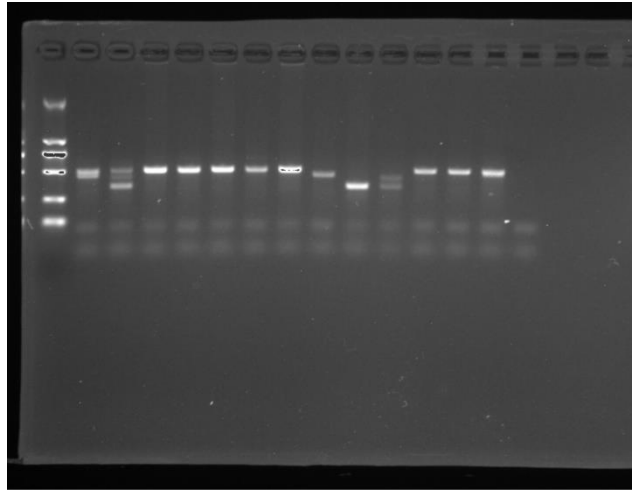

Full-length gel of Figure S4A

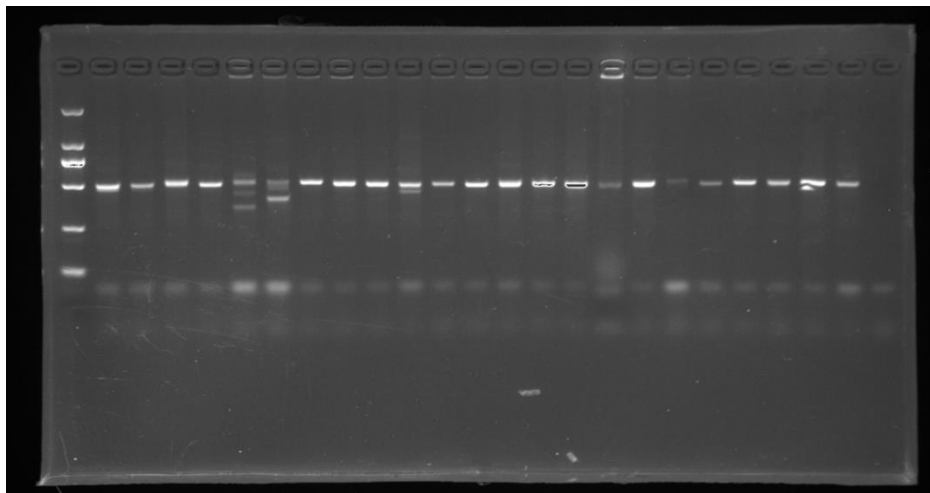

Full-length gel of Figure S4B

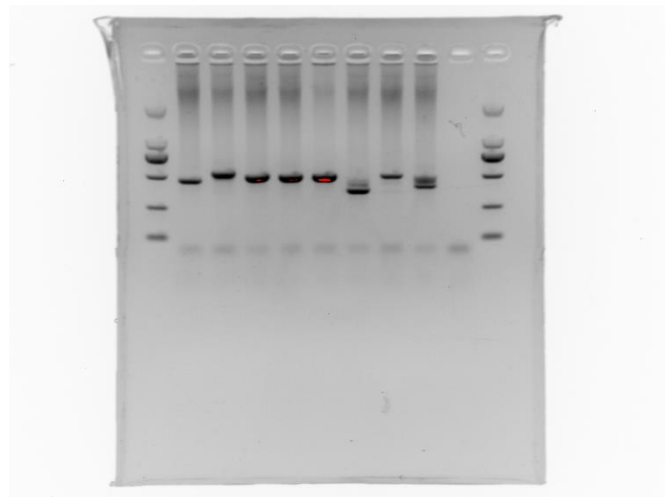

Full-length gel of Figure S9A
